# Supplementary material
Source: PubMed Central journal article supplement (PMC3031372)
Supplement: supp_124_4_613__2.pdf [file supp_124_4_613__2.pdf]

| Organism                                                          | Annotation    | Accession                                               | Alignment identifier |
|-------------------------------------------------------------------|---------------|---------------------------------------------------------|----------------------|
| <b>Final Sequences</b>                                            |               |                                                         |                      |
|                                                                   | Vps27/Tom1    |                                                         |                      |
| H. sapiens                                                        | Vps27         | NP_004703                                               | HSV27                |
| D. rerio                                                          | Vps27         | XP_002661278                                            | DRV27                |
| G. gallus                                                         | Vps27         | XP_426233                                               | GGV27                |
| C. intestinalis                                                   | Vps27         | NP_001071892                                            | CIV27                |
| N. vectensis                                                      | Vps27         | 182116                                                  | NVV27                |
| D. melanogaster                                                   | Vps27         | NP_722830                                               | DMV27                |
| M. brevicollis                                                    | Vps27         | 2665                                                    | MBV27                |
| C. neoformans                                                     | Vps27         | XP_570941                                               | CNV27                |
| S. cerevisiae                                                     | Vps27         | P40343                                                  | SCV27                |
| H. sapiens                                                        | Tom1          | NP_005479                                               | HST1                 |
| H. sapiens                                                        | Tom1L1        | NP_005477                                               | HST1L1               |
| H. sapiens                                                        | Tom1L2        | NP_001076437                                            | HST1L2               |
| D. rerio                                                          | Tom1a         | AAI16549                                                | DRT1a                |
| D. rerio                                                          | Tom1b         | AAH56566                                                | DRT1b                |
| D. rerio                                                          | Tom1L2        | XP_688819                                               | DRT1L2               |
| G. gallus                                                         | Tom1          | NP_990475                                               | GGT1                 |
| G. gallus                                                         | Tom1L1        | XP_415646                                               | GGT1L1               |
| G. gallus                                                         | Tom1L2        | XP_414813                                               | GGT1L2               |
| C. intestinalis                                                   | Tom1esc       | XP_002128241                                            | CIT1E                |
| N. vectensis                                                      | Tom1esc       | 100273                                                  | NVT1E                |
| D. melanogaster                                                   | Tom1esc       | NP_648315                                               | DMT1E                |
| M. brevicollis                                                    | Tom1esc       | 13859                                                   | MBT1E                |
| C. neoformans                                                     | Tom1esc a     | XP_570354                                               | CNT1Ea               |
| C. neoformans                                                     | Tom1esc b     | XP_572930                                               | CNT1Eb               |
| D. discoideum                                                     | Tom1esc       | XP_635855                                               | DDT1E                |
| E. histolytica                                                    | Tom1esc a     | XP_651355                                               | EHT1Ea               |
| E. histolytica                                                    | Tom1esc b     | XP_653676                                               | EHT1Eb               |
| A. thaliana                                                       | Tom1esc a     | NP_195002                                               | ATT1Ea               |
| A. thaliana                                                       | Tom1esc b     | NP_564138                                               | ATT1Eb               |
| A. thaliana                                                       | Tom1esc c     | NP_177823                                               | ATT1Ec               |
| A. thaliana                                                       | Tom1esc d     | NP_197190                                               | ATT1Ed               |
| A. thaliana                                                       | Tom1esc e     | NP_187491                                               | ATT1Ee               |
| A. thaliana                                                       | Tom1esc f     | NP_181375                                               | ATT1Ef               |
| A. thaliana                                                       | Tom1esc g     | NP_195796                                               | ATT1Eg               |
| A. thaliana                                                       | Tom1esc h     | NP_201169                                               | ATT1Eh               |
| A. thaliana                                                       | Tom1esc i     | NP_563762                                               | ATT1Ei               |
| C. reinhardtii                                                    | Tom1esc       | 401111                                                  | CRT1E                |
| O. tauri                                                          | Tom1esc       | 11249                                                   | OTT1E                |
| C. merolae                                                        | Tom1esc       | CME025C                                                 | CMT1E                |
| O. sativa                                                         | Tom1esc a     | NP_001046532                                            | OST1Ea               |
| O. sativa                                                         | Tom1esc b     | NP_001042484                                            | OST1Eb               |
| O. sativa                                                         | Tom1esc c     | NP_001057544                                            | OST1Ec               |
| O. sativa                                                         | Tom1esc d     | NP_001067438                                            | OST1Ed               |
| O. sativa                                                         | Tom1esc e     | NP_001055830                                            | OST1Ee               |
| O. sativa                                                         | Tom1esc f     | NP_001047818                                            | OST1Ef               |
| O. sativa                                                         | Tom1esc g     | NP_001060807                                            | OST1Eg               |
| O. sativa                                                         | Tom1esc h     | AAL58181                                                | OST1Eh               |
| O. sativa                                                         | Tom1esc i     | NP_001044671                                            | OST1Ei               |
| O. sativa                                                         | Tom1esc j     | NP_001055241                                            | OST1Ej               |
| P. patens                                                         | Tom1esc       | 196153                                                  | PPT1E                |
| P. patens                                                         | Tom1esc       | XP_001010380                                            | PTT1E                |
| P. ramorum                                                        | Tom1esc a     | 75625                                                   | PRT1Ea               |
| P. ramorum                                                        | Tom1esc b     | 76391                                                   | PRT1Eb               |
| N. gruberi                                                        | Tom1esc       | 68824                                                   | NGT1E                |
|                                                                   | <b>ESCRTs</b> |                                                         |                      |
| B. anathema                                                       | Vps28         | HM773427                                                |                      |
| B. anathema                                                       | Vps2          | HM773426                                                | BAVPS2               |
| B. anathema                                                       | Vps20         | HM773425                                                | BAVPS20              |
| B. anathema                                                       | Vps32         | HM773428                                                | BAVPS32              |
| B. anathema                                                       | Vps4          | HM773429                                                |                      |
| B. anathema                                                       | Vps31         | HM773430                                                |                      |
| B. anathema                                                       | Vps46         | HM773431                                                | BAVPS46              |
| M. balamuthi                                                      | Vps23         | EC703007                                                |                      |
| M. balamuthi                                                      | Vps23         | EC698844                                                |                      |
| M. balamuthi                                                      | Vps28         | EC711962                                                |                      |
| M. balamuthi                                                      | Vps37         | GU292811                                                |                      |
| M. balamuthi                                                      | Vps22         | EC710818                                                |                      |
| M. balamuthi                                                      | Vps25         | EC701301                                                |                      |
| M. balamuthi                                                      | Vps2          | EC707267                                                | MBVPS2               |
| M. balamuthi                                                      | Vps24         | GU256250                                                | MBVPS24              |
| M. balamuthi                                                      | Vps4          | EC708596                                                |                      |
| M. balamuthi                                                      | Vps46         | EC711152                                                | MBVPS46              |
| A. castellanii                                                    | Vps28         | Contig5296 Contigs_from_Unchanged_contigs Contig3550    |                      |
| A. castellanii                                                    | Vps22         | Contig7727 Contigs_from_Unchanged_contigs Contig6633    |                      |
| A. castellanii                                                    | Vps36         | Contig16524 Contigs_from_Unchanged_contigs Contig17568  |                      |
| A. castellanii                                                    | Vps2          | Contig1459 CBINs/cbin297.fa.contigs cbin297.fa.Contig1  | ACVPS2               |
| A. castellanii                                                    | Vps4          | Contig724 CBINs/cbin1496.fa.contigs cbin1496.fa.Contig1 |                      |
| A. castellanii                                                    | Vps4          | Contig2440 Contigs_from_Unchanged_contigs Contig1       |                      |
| A. castellanii                                                    | Vps46         | Contig2560 Contigs_from_Unchanged_contigs Contig155     | ACVPS46              |
| A. castellanii                                                    | Vta1          | Contig2144 CBINs/cbin793.fa.contigs cbin793.fa.Contig2  |                      |
| P. polycephalum                                                   | Vps37         | EL564641                                                |                      |
| P. polycephalum                                                   | Vps36         | EL576160                                                |                      |
| P. polycephalum                                                   | CHMP7         | EL572472                                                |                      |
| P. polycephalum                                                   | Vps4          | EL5475991                                               |                      |
| P. polycephalum                                                   | Vps46         | EL577848                                                | PPVPS46              |
| H. vermiformis                                                    | Vps25         | EC132121                                                |                      |
| H. vermiformis                                                    | Vps2          | EC132715                                                | HVVPS2               |
| H. vermiformis                                                    | Vps24         | EC132318                                                | HVVPS24              |
| H. vermiformis                                                    | Vps31         | combined EC128183 and EC133221                          |                      |
| H. sapiens                                                        | Vps20         | NP_078867                                               | HSVPS20              |
| H. sapiens                                                        | Vps32a        | NP_054888                                               | HSVPS32A             |
| H. sapiens                                                        | Vps32b        | NP_789782                                               | HSVPS32B             |
| H. sapiens                                                        | Vps32c        | NP_689497                                               | HSVPS32C             |
| H. sapiens                                                        | Vps60         | NP_057494                                               | HSVPS60              |
| S. cerevisiae                                                     | Vps20         | NP_013794                                               | SCVPS20              |
| S. cerevisiae                                                     | Vps32         | NP_013125                                               | SCVPS32              |
| S. cerevisiae                                                     | Vps60         | NP_010774                                               | SCVPS60              |
| D. discoideum                                                     | Vps20         | XP_637438                                               | DDVPS20              |
| D. discoideum                                                     | Vps32         | XP_643404                                               | DDVPS32              |
| D. discoideum                                                     | Vps60         | XP_636927                                               | DDVPS60              |
| E. histolytica                                                    | Vps32         | XP_656010                                               | EHVPS32              |
| E. histolytica                                                    | Vps60         | XP_650324                                               | EHVPS60              |
| H. sapiens                                                        | Vps2a         | NP_055268                                               | HSVPS2A              |
| H. sapiens                                                        | Vps2b         | NP_054762                                               | HSVPS2B              |
| H. sapiens                                                        | Vps24         | NP_057163                                               | HSVPS24              |
| H. sapiens                                                        | Vps46a        | NP_002759                                               | HSVPS46A             |
| H. sapiens                                                        | Vps46b        | NP_065145                                               | HSVPS46B             |
| S. cerevisiae                                                     | Vps2          | NP_012924                                               | SCVPS2               |
| S. cerevisiae                                                     | Vps24         | NP_012883                                               | SCVPS24              |
| S. cerevisiae                                                     | Vps46         | NP_012961                                               | SCVPS46              |
| D. discoideum                                                     | Vps2a         | XP_629585                                               | DDVPS2A              |
| D. discoideum                                                     | Vps2b         | XP_635908                                               | DDVPS2B              |
| D. discoideum                                                     | Vps24         | XP_638395                                               | DDVPS24              |
| D. discoideum                                                     | Vps46         | XP_647634                                               | DDVPS46              |
| E. histolytica                                                    | Vps2          | XP_654699                                               | EHVPS2               |
| <b>Sequences from the first round of Vps27/Tom1 phylogenetics</b> |               |                                                         |                      |
| H. sapiens                                                        | Vps27         | NP_004703                                               | HSV27                |
| H. sapiens                                                        | Tom1          | NP_005479                                               | HST1                 |
| H. sapiens                                                        | Tom1L1        | NP_005477                                               | HST1L1               |
| H. sapiens                                                        | Tom1L2a iso1  | NP_001028723                                            | HST1L2a              |
| H. sapiens                                                        | Tom1L2b iso2  | NP_001076437                                            | HST1L2b              |
| S. cerevisiae                                                     | Vps27         | P40343                                                  | SCV27                |
| D. melanogaster                                                   | Vps27         | NP_722830                                               | DMV27                |
| D. melanogaster                                                   | Tom1L2        | NP_648315                                               | DMT1L2               |
| C. neoformans                                                     | Vps27a        | XP_570941                                               | CNV27a               |
| C. neoformans                                                     | Tom1          | XP_570354                                               | CNT1                 |
| C. neoformans                                                     | Vps27b        | XP_572930                                               | CNV27b               |
| D. rerio                                                          | Vps27         | XP_002661278                                            | DRV27                |
| D. rerio                                                          | Tom1a         | AAI16549                                                | DRT1a                |
| D. rerio                                                          | Tom1b         | AAH56566                                                | DRT1b                |
| D. rerio                                                          | Tom1L2        | XP_688819                                               | DRT1L2               |
| N. vectensis                                                      | Vps27         | 182116                                                  | NVV27                |
| N. vectensis                                                      | Tom1L2        | 100273                                                  | NVT1L2               |
| M. brevicollis                                                    | Vps27         | 2665                                                    | MBV27                |
| M. brevicollis                                                    | Tom1L2        | 13859                                                   | MBT1L2               |
| D. discoideum                                                     | Tom1L2        | XP_635855                                               | DDT1L2               |
| E. histolytica                                                    | Tom1a         | XP_651355                                               | EHT1a                |
| E. histolytica                                                    | Tom1b         | XP_001913512                                            | EHT1b                |
| E. histolytica                                                    | Tom1L2        | XP_653676                                               | EHT1L2               |
| A. thaliana                                                       | Tom1L2a       | NP_195002                                               | ATT1L2a              |
| A. thaliana                                                       | Tom1L2b       | NP_564138                                               | ATT1L2b              |
| A. thaliana                                                       | Tom1L2c       | NP_177823                                               | ATT1L2c              |
| A. thaliana                                                       | Tom1L2d       | NP_197190                                               | ATT1L2d              |
| A. thaliana                                                       | Tom1L2e       | NP_187491                                               | ATT1L2e              |
| A. thaliana                                                       | Tom1L2f       | NP_181375                                               | ATT1L2f              |
| A. thaliana                                                       | Tom1L2g       | NP_195796                                               | ATT1L2g              |
| A. thaliana                                                       | Tom1L2h       | CAA18585                                                | ATT1L2h              |
| A. thaliana                                                       | Tom1L1        | NP_201169                                               | ATT1L1               |
| A. thaliana                                                       | Tom1a         | AAC00635                                                | ATT1a                |
| A. thaliana                                                       | Tom1b         | NP_973770                                               | ATT1b                |
| A. thaliana                                                       | Tom1c         | NP_563762                                               | ATT1c                |
| C. reinhardtii                                                    | Tom1L2        | 401111                                                  | CRT1L2               |
| O. tauri                                                          | Tom1L2        | 11249                                                   | OTT1L2               |
| C. merolae                                                        | Tom1L2        | CME025C                                                 | CMT1L2               |
| O. sativa                                                         | Vps27a        | NP_001065496                                            | OSV27a               |
| O. sativa                                                         | Vps27b        | BAF12780                                                | OSV27b               |
| O. sativa                                                         | Tom1a         | EEE51810                                                | OST1a                |
| O. sativa                                                         | Tom1b         | EAY79641                                                | OST1b                |
| O. sativa                                                         | Tom1L2a       | NP_001046532                                            | OST1L2a              |
| O. sativa                                                         | Tom1L2b       | EEE56715                                                | OST1L2b              |
| O. sativa                                                         | Tom1L2c       | NP_001042484                                            | OST1L2c              |
| O. sativa                                                         | Tom1L2d       | EAY73130                                                | OST1L2d              |
| O. sativa                                                         | Tom1L2e       | EEC80523                                                | OST1L2e              |
| O. sativa                                                         | Tom1L2f       | NP_001057544                                            | OST1L2f              |
| O. sativa                                                         | Tom1L2g       | NP_001067438                                            | OST1L2g              |
| O. sativa                                                         | Tom1L2h       | NP_001055830                                            | OST1L2h              |
| O. sativa                                                         | Tom1L2i       | NP_001044671                                            | OST1L2i              |
| O. sativa                                                         | Tom1L2j       | EAY97588                                                | OST1L2j              |
| O. sativa                                                         | Tom1L2k       | NP_001055241                                            | OST1L2k              |
| O. sativa                                                         | Tom1L2l       | EEC67842                                                | OST1L2l              |
| O. sativa                                                         | Tom1L2m       | EEC71726                                                | OST1L2m              |
| O. sativa                                                         | Tom1L2n       | NP_001047818                                            | OST1L2n              |
| O. sativa                                                         | Tom1L2o       | AAL58181                                                | OST1L2o              |
| O. sativa                                                         | Tom1L2p       | EAZ05339                                                | OST1L2p              |
| O. sativa                                                         | Tom1L2q       | NP_001060807                                            | OST1L2q              |
| O. sativa                                                         | Tom1L2r       | ABR25582                                                | OST1L2r              |
| P. patens                                                         | Vps27a        | 114284                                                  | PPV27a               |
| P. patens                                                         | Vps27b        | 124457                                                  | PPV27b               |
| P. patens                                                         | Vps27c        | 204293                                                  | PPV27c               |
| P. patens                                                         | Tom1L2a       | 196153                                                  | PPT1L2a              |
| P. patens                                                         | Tom1L2b       | 205924                                                  | PPT1L2b              |
| P. patens                                                         | Tom1L2c       | 114284                                                  | PPT1L2c              |
| P. patens                                                         | Tom1L2d       | 124457                                                  | PPT1L2d              |
| T. gondii                                                         | Vps27         | TGGT1_058390                                            | TGV27                |
| T. thermophila                                                    | Tom1L2a       | XP_001023917                                            | TTT1L2a              |
| T. thermophila                                                    | Tom1L2b       | XP_001010380                                            | TTT1L2b              |
| P. ramorum                                                        | Vps27a        | 96230                                                   | PRV27a               |
| P. ramorum                                                        | Vps27b        | 75625                                                   | PRV27b               |
| P. ramorum                                                        | Vps27c        | 80414                                                   | PRV27c               |
| P. ramorum                                                        | Vps27d        | 95441                                                   | PRV27d               |
| P. ramorum                                                        | Vps27e        | 78138                                                   | PRV27e               |
| P. ramorum                                                        | Vps27f        | 72659                                                   | PRV27f               |
| P. ramorum                                                        | Vps27g        | 84876                                                   | PRV27g               |
| P. ramorum                                                        | Vps27h        | 72804                                                   | PRV27h               |
| P. ramorum                                                        | Vps27i        | 86789                                                   | PRV27i               |
| P. ramorum                                                        | Tom1L2        | 76391                                                   | PRT1L2               |
| T. brucei                                                         | Tom1a         | XP_829141                                               | TBT1a                |
| T. brucei                                                         | Tom1b         | CBH18087                                                | TBT1b                |
| L. major                                                          | Tom1          | XP_001687100                                            | LMT1                 |
| T. cruzi                                                          | Tom1a         | XP_803318                                               | TCT1a                |
| T. cruzi                                                          | Tom1b         | XP_813111                                               | TCT1b                |
| N. gruberi                                                        | Tom1L1        | 68824                                                   | NGT1L1               |
