# Supplementary material
Source: PubMed Central journal article supplement (PMC3031372)
Supplement: supp_124_4_613__3.pdf [file supp_124_4_613__3.pdf]

| Organism        | Annotation | Accession                                               | Domain                  | Pfam                      | Missing domains                                |
|-----------------|------------|---------------------------------------------------------|-------------------------|---------------------------|------------------------------------------------|
| B. anathema     | Vps28      | HM773427                                                | Vps28                   | PF03997                   |                                                |
| B. anathema     | Vps2       | HM773426                                                | Snf7                    | PF03357                   |                                                |
| B. anathema     | Vps20      | HM773425                                                | Snf7                    | PF03357                   |                                                |
| B. anathema     | Vps32      | HM773428                                                | Snf7                    | PF03357                   |                                                |
| B. anathema     | Vps4       | HM773429                                                | AAA ATPase, Vps4_C      | PF00004, PF09336          | MIT domain (PF04212)                           |
| B. anathema     | Vps31      | HM773430                                                | Not found               |                           | Bro1 domain (PF03097)                          |
| B. anathema     | Vps46      | HM773431                                                | Snf7                    | PF03357                   |                                                |
| M. balamuthi    | Vps23      | EC703007                                                | Not found               |                           | UEV (PF05743) and Vps23 core (PF09454) domains |
| M. balamuthi    | Vps23      | EC698844                                                | Vps23_core              | PF09454                   | UEV domain (PF05743)                           |
| M. balamuthi    | Vps28      | EC711962                                                | Vps28                   | PF03997                   |                                                |
| M. balamuthi    | Vps37      | GU292811                                                | Mod_r                   | PF07200                   |                                                |
| M. balamuthi    | Vps22      | EC710818                                                | EAP/Vps36               | PF04157                   |                                                |
| M. balamuthi    | Vps25      | EC701301                                                | ESCRT-II                | PF05871                   |                                                |
| M. balamuthi    | Vps2       | EC707267                                                | Snf7                    | PF03357                   |                                                |
| M. balamuthi    | Vps24      | GU256250                                                | Snf7                    | PF03357                   |                                                |
| M. balamuthi    | Vps4       | EC708596                                                | MIT, AAA ATPase         | PF04212, PF00004          | Vps4_C domain (PF09336)                        |
| M. balamuthi    | Vps46      | EC711152                                                | Snf7                    | PF03357                   |                                                |
| A. castellanii  | Vps28      | Contig5296 Contigs_from_Unchanged_contigs Contig3550    | Vps28                   | PF03997                   |                                                |
| A. castellanii  | Vps22      | Contig7727 Contigs_from_Unchanged_contigs Contig6633    | EAP30/Vps36             | PF04157                   |                                                |
| A. castellanii  | Vps36      | Contig16524 Contigs_from_Unchanged_contigs Contig17568  | EAP30/Vps36             | PF04157                   |                                                |
| A. castellanii  | Vps2       | Contig1459 CBINs/cbin297.fa.contigs cbin297.fa.Contig1  | Snf7                    | PF03357                   |                                                |
| A. castellanii  | Vps4       | Contig724 CBINs/cbin1496.fa.contigs cbin1496.fa.Contig1 | MIT, AAA ATPase         | PF04212, PF00004          | Vps4_C domain (PF09336)                        |
| A. castellanii  | Vps4       | Contig2440 Contigs_from_Unchanged_contigs Contig1       | MIT, AAA ATPase, Vps4_C | PF04212, PF00004, PF09336 |                                                |
| A. castellanii  | Vps46      | Contig2560 Contigs_from_Unchanged_contigs Contig155     | Snf7                    | PF03357                   |                                                |
| A. castellanii  | Vta1       | Contig2144 CBINs/cbin793.fa.contigs cbin793.fa.Contig2  | DUF605/Vta1-like        | PF04652                   |                                                |
| P. polycephalum | Vps37      | EL564641                                                | Mod_r                   | PF07200                   |                                                |
| P. polycephalum | Vps36      | EL576160                                                | Vps36_ESCRT-II          | PF11605                   |                                                |
| P. polycephalum | CHMP7      | EL572472                                                | Not found               |                           | Snf7 domain (PF03357)                          |
| P. polycephalum | Vps4       | EL5475991                                               | MIT, AAA ATPase         | PF04212, PF00004          | Vps4_C domain (PF09336)                        |
| P. polycephalum | Vps46      | EL577848                                                | Snf7                    | PF03357                   |                                                |
| H. vermiformis  | Vps25      | EC132121                                                | ESCRT-II                | PF05871                   |                                                |
| H. vermiformis  | Vps2       | EC132715                                                | Snf7                    | PF03357                   |                                                |
| H. vermiformis  | Vps24      | EC132318                                                | Snf7                    | PF03357                   |                                                |
| H. vermiformis  | Vps31      | combined EC128183 and EC133221                          | BRO1                    | PF03097                   |                                                |
